# Supplementary material for: In Situ Monitoring the Potassium-Ion Storage Enhancement in Iron Selenide with Ether-Based Electrolyte
Source: PubMed Central journal article supplement (PMC8374025; doi:10.1007/s40820-021-00708-1), 2021-08-18
Supplement: 40820_2021_708_MOESM1_ESM.pdf [file 40820_2021_708_MOESM1_ESM.pdf]

Supporting Information for

## **In-Situ Monitoring the Potassium Ion Storage Enhancement in Iron Selenide with Ether-Based Electrolyte**

Xiaodan Li<sup>1</sup>, Jinliang Li<sup>1,\*</sup>, Wenchen Zhuo<sup>1</sup>, Zhibin Li<sup>1</sup>, Liang Ma<sup>1</sup>, Zhong Ji<sup>1</sup>, Likun Pan<sup>2</sup>, Wenjie Mai<sup>1,\*</sup>

<sup>1</sup>Siyuan Laboratory, Guangzhou Key Laboratory of Vacuum Coating Technologies and New Energy Materials, Guangdong Provincial Engineering Technology Research Center of Vacuum Coating Technologies and New Materials, Department of Physics, Jinan University, Guangzhou, Guangdong 510632, P. R. China

<sup>2</sup>Shanghai Key Laboratory of Magnetic Resonance, School of Physics and Electronic Science, East China Normal University, Shanghai 200241, P. R. China

\*Corresponding authors. E-mail: [lijinliang@email.jnu.edu.cn](mailto:lijinliang@email.jnu.edu.cn) (Jinliang Li); [wenjjiemai@email.jnu.edu.cn](mailto:wenjjiemai@email.jnu.edu.cn) (Wenjie Mai)

### **Supplementary Tables and Figures**

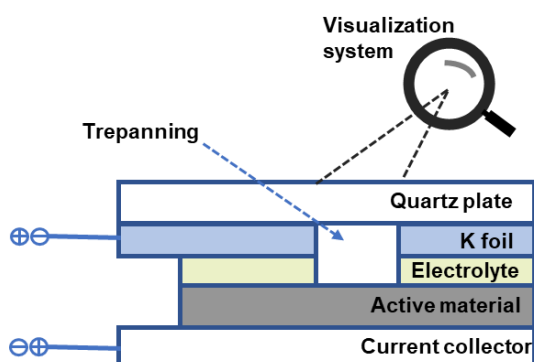

**Fig. S1** Detail testing schematic of in-situ visualization

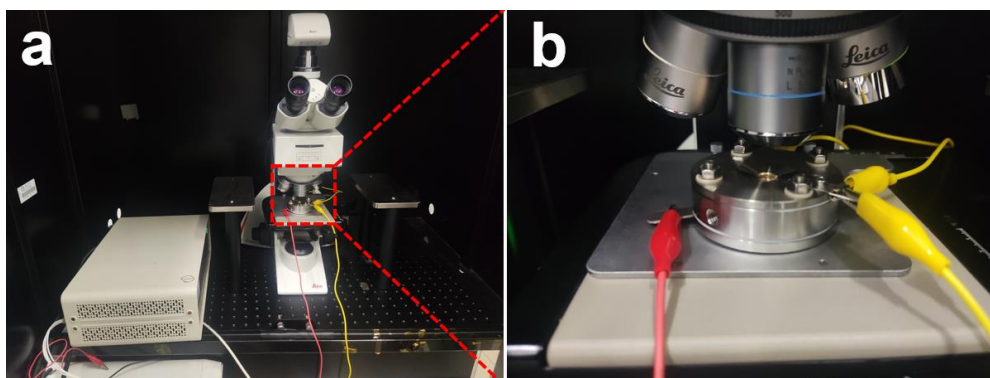

**Fig. S2** Photograph of in-situ visualization testing system

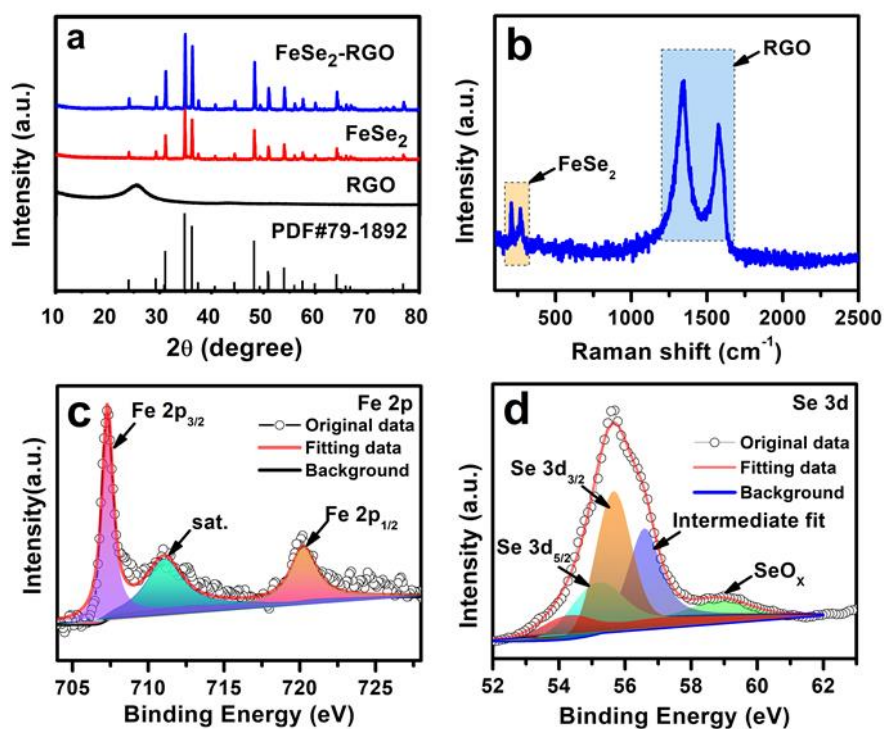

**Fig. S3** (a) XRD patterns of RGO, FeSe<sub>2</sub> and FeSe<sub>2</sub>@RGO; (b) Raman spectrum of FeSe<sub>2</sub>@RGO; (c) Fe 2p and (d) Se 3d XPS spectra of FeSe<sub>2</sub>@RGO

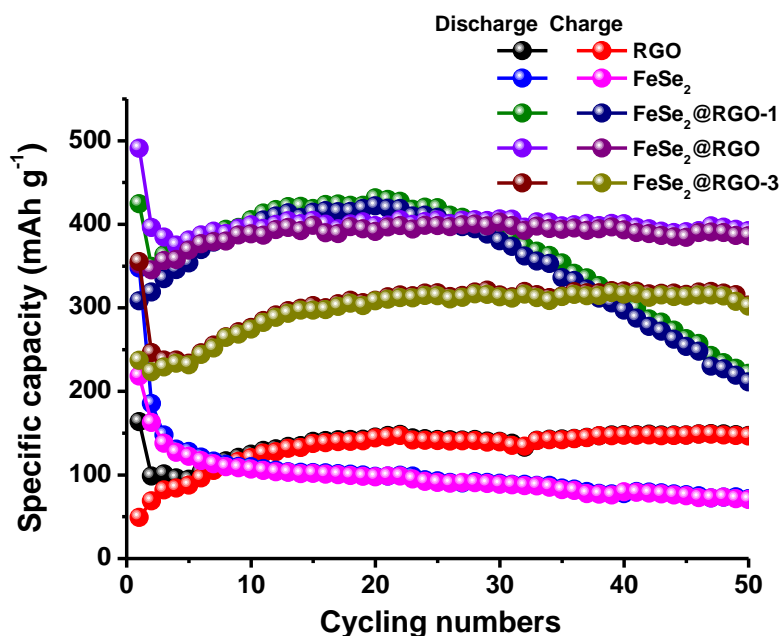

**Fig. S4** Cycling performance of RGO, FeSe<sub>2</sub>, FeSe<sub>2</sub>@RGO-1, FeSe<sub>2</sub>@RGO and FeSe<sub>2</sub>@RGO-3 with DME-based electrolyte at a current density of 100 mA g<sup>-1</sup>

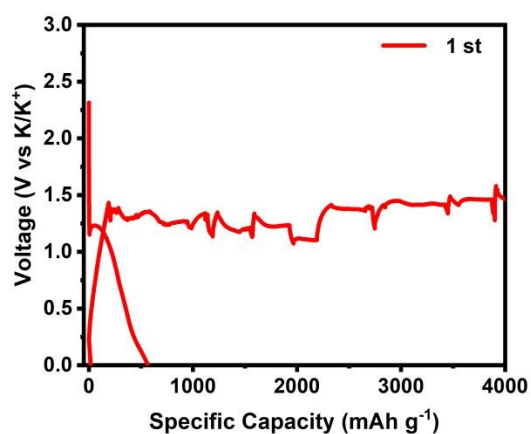

Fig. S5 GCD curves of FeSe<sub>2</sub>-RGO electrode using DME- 1 based electrolyte

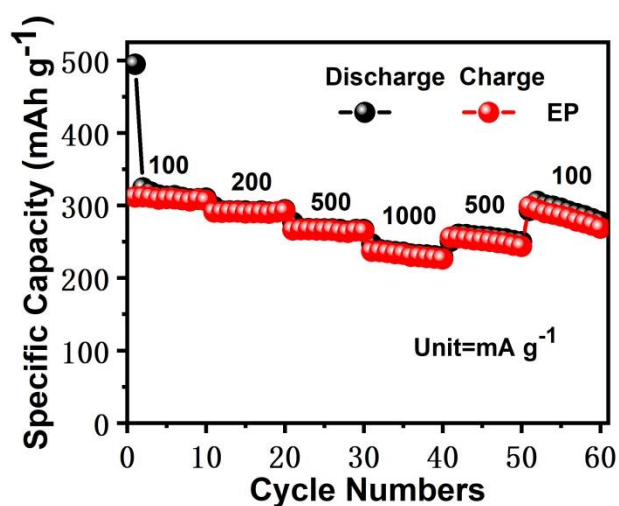

Fig. S6 Rate performance of FeSe<sub>2</sub>-RGO electrode using EP-based electrolyte

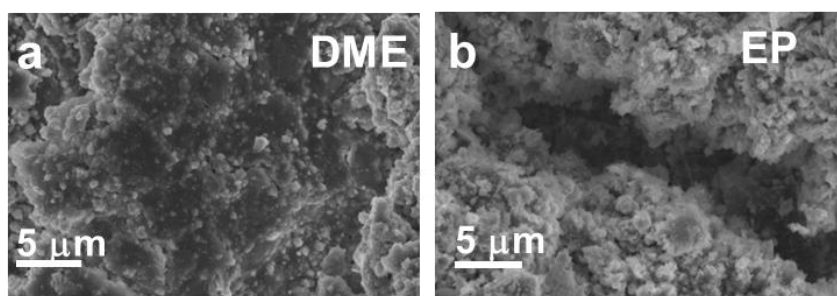

Fig. S7 SEM images of electrode in (a) DME-based and (b) EP-based electrolytes after cycles

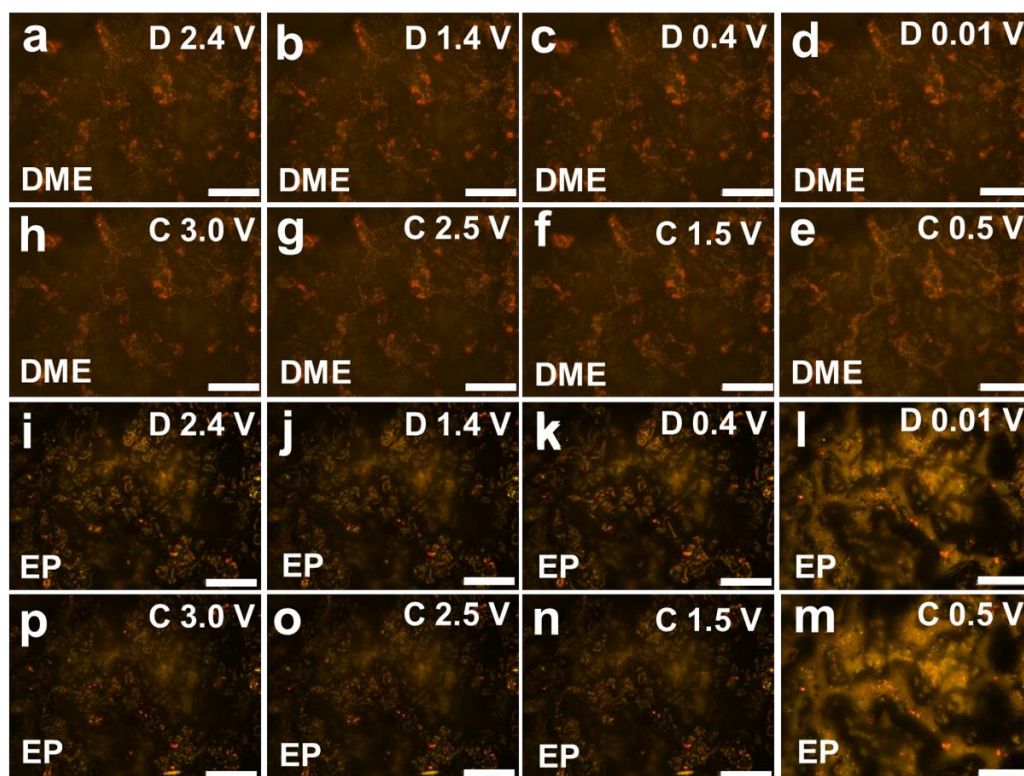

**Fig. S8** In situ visualization: (a-h) different potassiation-depotassiation states of FeSe<sub>2</sub>@RGO electrode using DME-based electrolyte in the second cycle; (i-p) different potassiation-depotassiation states of FeSe<sub>2</sub>@RGO electrode using EP-based electrolyte in the second cycle. The scale bar in each image is 50 μm.

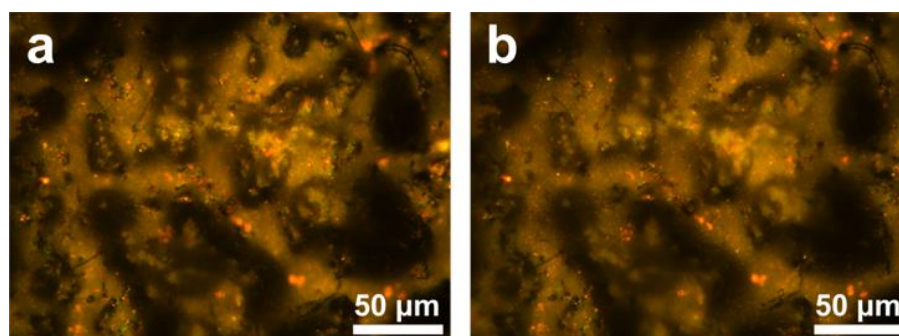

**Fig. S9** In situ visualization of FeSe<sub>2</sub>@RGO electrode using EP-based electrolyte: (a) charging to 0.38 V in the first cycle; (b) charging to 0.12 V in the second cycle. It is found that huge morphological change in this state, indicating the appearance of inhomogeneous expansion.

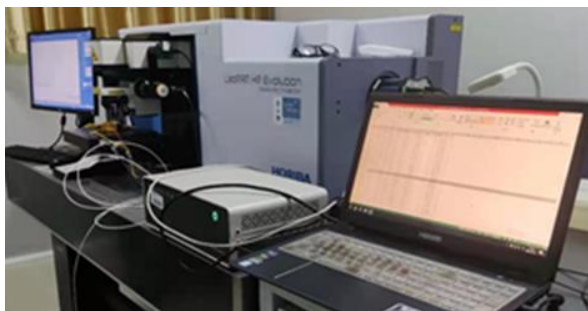

**Fig. S10** Photograph of the practical in-situ Raman spectra testing system

**Video S1** In-situ visualization of FeSe<sub>2</sub>@RGO electrode using DME-based electrolyte in initial two cycles.

**Video S2** In-situ visualization of FeSe<sub>2</sub>@RGO electrode using EP-based electrolyte in initial two cycles.
